# Supplementary material for: Clinical Insights in Cyclic Vomiting Syndrome Based on Genetic Findings
Source: Preprints.org preprint supplement (doi:10.20944/preprints202306.1284.v1), 2023-06-19
Supplement: Supplementary file 1 [file supplementary]

## Sheet: Sheet1
Table 1a; Parameters of Episodes (Intraictal)									Table 1b: Interictal/Comorbidities															Table 1c Molecular Findings
Patient number	Age/sex/race	Age of onset	Episode Triggers	Prodrome	Associated features2	Episode Frequency (wks)	Episode duration (hrs)	Episode Intensity	Patient number	Pain	Gastrointestinal (GI)	Dysautonomia	Allergy and Immunology	Sleep	Psychaitric	Neurological Manifestations Not Fitting Well into the Other Categories	Neurodevelopmental	Fatigue	Genitourinary	Connective	Endocrine	Other Phenotypes		Patient number	Clinical Diagnosis Variants, Paroxysmal Genes	Pathogenic/Likely Pathogenic (P/LP) Variants, Paroxysmal Genes	Other Qualifying Variants, Paroxysmal Genes	Key Qualifying Variants from Exome-Wide Search	Key Qualifying Variants, DNTR/Control Genes	Other Qualifying Variants, DNTR/Control Genes	Mitochondrial DNA Key Qualifying Variants	Mitochondrial DNA Other Qualifying Variants
1	11/F/Eu,NA	9	emotional stress	sore throat a couple minutes to a day before vomiting.	diarrhea, fatigue, headache	2-3	120	requires emergency care or ondansetron to abort episode	1	headache, neck, leg	nausea, constipation		pruritus, petechial-like dots											1			ATP1A2 (p.Glu492Lys , c.1474G>A); CACNA1A (p.Ala454Thr)	COQ2 (p.Arg22*)
2	16/M/Eu	13	none, URI	none	lethargy, pallor and dizziness, occasionally constipation	2-9	72-96	requires emergency care	2		nausea							(+)						2			OPRM1 (p.Cys192Phe, c.575G>T); TRPA1 (p.Asn109Lys)
3	2/F/Eu	8 m/o	none	coughing in the middle of the night	cannot stand during episode, holds stomach, pain unclear	4-5	48	vomiting 20-30 mins for 8-12 hours	3															3			TRAP1 (p.Ser477_Gly478insAla , c.1430_1432dupCCG); TRAP1 (p.Gly445Ser , c.1333G>A)
4	12/F/Eu,La	1 week	emotional stress, heat, dizziness	headache	periumbilical pain, halitosis, ketosis (“like anesthesia”), hiccups, pallor, deeper circles under eyes, fatigue, lethargy, headaches, phonophobia, and occasional fecal incontinence	1	5	requires emergency care if not treated rapidly	4	myalgia, migraine/headaches	GERD, constipation, eosinophilic esophagitis	heat/cold intolerance, dizziness	pruritus, asthma		anxiety	diplopia		(+)	urinary incontinence/frequency					4			RYR2 (p.Gly1885Glu)	INF2 (p.Leu480Gln)
5	24/F/Eu	9	emotional stress, anxiety, illness, alcohol	wakes up with abdominal pain	lethargy, anxiety, and pallor	6	72	severe nausea lasting 2 weeks	5	migraine, neck/joint pain	nausea, IBS	POTS, heat intolerance	pruritis, hives		anxiety	neuropathic pain		(+)						5	MEFV (p.Val726Ala , c.2177T>C);	MEFV (p.Val726Ala , c.2177T>C);	CACNA1A (CAG 7/13)
6	2/F/Eu	5 m/o	emotional stress	banging head	feeding intolerance, lethargy, photophobia, some phonophobia. Barely responsive, vital sign abnormalities	3-4	48-120	severe (high blood pressure, high heart rate, vomits blood, acidosis, barely responsive when its at its worse) requires admission for intravenous fluid	6	fingers, toes, abdomen, headache		previous unexplained fever	hypogammaglobulinemia				intellectual disability	(+)				Goltz syndrome		6			CACNA1A (p.Gln2329_Ala2330delinsPro , c.6986_6988delAGG)	Deletion 15q11.2 (22815306_23217514)(42kb); PORCN (p.Arg232*)
7	13/F/ME	2	soy, possibly catamenial	none	abdominal pain, lethargy, photophobia, phonophobia, dizziness, agitation, worse constipation, headache	0.5	24-48	extreme nausea, requires emergency care to abort episodes	7		IBS, constipation				anxiety	sensory issues	intellectual disability, ADHD	(+)			growth hormone deficiency/hypopituitarism			7			TRAP1 (p.Arg469Cys); SCN9A (p.Val1726Phe, c.5176G>T)
8	19/F/Eu, ME	16	fatigue, exercise, lack of sleep, overeating, emotional stress	none		daily	24	severe, vomits 2-8 times per day	8	migraine/headaches, abdomen, vaginitis	nausea	heat/cold intolerance	pruritus	insomnia	anxiety, depression	tinnitus								8			CACNA1A (CAG 7/13); RYR1 (p.Thr2478Asn, c.7433C>A)	GLA (p.Ala143Thr, c.427G>A)
9	19/F/Eu	10 m/o	none, viral illness	none	worse constipation and fatigue, sleeps more	In an episode 50-60% of the time	4380	severe, vomiting up to 40x/day; worse vomiting 10x/hour	9	migraine/headaches, abdomen	IBS, nausea	POTS, presyncope, heat intolerance	eczema	hypersomnia	anxiety	CMT neuropathy, paresthesia, tinnitus, muscle weakness		(+)	urinary hesitancy			anemia		9	SCN9A (p.Asn1256Ser)		RYR2 (p.Arg3567Cys); POLG (p.Gly268Ala); SCN9A (p.Val1715Phe)	SH3TC2 (144bp del); ADAMTS2 (homozygous 41-bp deletion
10	9/F/EA	5	none	mild abdominal pain	lethargy	365	216	peak emesis every 15 min; usually in emergency care for 5 hrs on first day, returns on other days if dehydrated	10															10
11	7/F/Eu	5	exhaustion, viral illnesses	none	diarrhea, lethargy, ketonuria	6-9	24	max emesis > 13 times.	11	leg, shoulders, chest	IBS, nausea, constipation	unexplained fever, cold intolerance		parasomnia		hypotonia, ptosis when tired, phoria, muscle twitching		(+)	urinary burning and frequency	hypermobility		heart block, anemia		11			CACNA1A (p.Ala454Thr , c.1360G>A); OPRM1 (p.Ser451Phe, c.1352C>T)
12	13/M/Eu	1	emotional stress	none	lethargy, headache, fatigue, photophobia, phonophobia, dizziness, and pallor, tachycardia	14-15	48	emesis in first half of the day, lethergic all day, almost normal on 3rd day	12	leg			eczema	parasomnia	anxiety, depression									12			TRAP1 (p.Arg469His); RYR2 (p.Arg1013Gln); RYR2 (p.Ser1400Gly)- both not conserved; MT-CYB (m.15884G>A) rare and conserved					CYB (m.15884G>A)
13	27/M/Eu	15	none	none	severe pain, lethargy/headache/photophobia/phonophobia	8-13	24-48	emergency care visits for intravenous fluid every episode; severe abdominal pain requiring intravenous hydromorphone	13	migraine, pain with manual labor	nausea, constipation	heat/cold intolerance	rash occasionally on arms and legs	parasomnia	anxiety, depression		ADHD, intellectual disability	(+)						13
14	18/F/Eu	15	none	none	lethargy, weakness, dizziness	2	5		14	migraine		near-syncope/syncope x1, low blood pressure and heart rate				Tourette								14		TNFRSF1A (p.Arg121Gln , c.362G>A)	CACNA1S (p.Pro1839Ser); TRAP1 (p.Gln165Glu)					COX3 (p.A178T, 9738G>A) very rare, highly-conserved
15	19/M/Eu,SA	4	heat, anxiety, lack of sleep	moodiness, lack of appetite, headaches, rash– 1-2 weeks before. Headache and nausea 2-3 days before.	headache, abdominal pain, lethargy, muscle weakness (symmetrical), sore throat, mild photophobia and phonophobia.	4	48-72	nausea is severe, episodes require emergency care	15	migraine/headaches	nausea	hands and feet turn purple, common in shower	MCAS	parasomnia		autonomic neuropathy		(+)						15			RYR2 (p.Thr1107Met, c.3320C>T) (Clinvar: P1V3LB5)-there's an abnormal fx study; SCN4A (p.Ser906Thr, c.2717G>C)
16	21/F/Eu,As	4	sun exposure, fasting, flashes of sunlight	occasional feeling in neck	palpitations, HA, photophobia, abdominal pain, fatigue, lethargy, B hand weakness, no aura	<1 week	4	half are severe	16	migraine, carotid pain, right hip joint of 2nd finger, deep pain in ovarian area bilaterally, two symmetrical skin areas in midback to either side, of spine, vulvodynia	nausea, constipation	cold intolerance, unexplaied fever, palpitations, tachycardia, low blood pressure	legs and arms itch frequently		anxiety, depression	paresthesia		(+)	decreased urinary sensation			bruises easily		16	CACNA1S (p.Thr1354Ser, c.4060A>T)					GLRA1 (p.Gly370Ser)
17	4/F/Eu,EA,As	9	none	stereotypical scream, then moved mouth	pain, lethargy	4	3-5	vomited 10-15x/hour at first, lasted 3-5 hours, followed by severe lethargy	17	migraine/headaches, leg pain, episodes of pain in eyes/head, extremities, neck, leg/foot, abdomen, knee	GERD	heat/cold intolerance, POTS, dizziness	pruritis, hives, frequent red rash; multiple otitis media, frequent upper respiratory tract infections	parasomnia		hypotonia		(+)	enuresis when heavily fatigued, intermittent dysuria			motion sickness, von Willebrand type 2n		17					GRM1 (p.Gly884Glu)	GRIN2A (p,Val967Leu)
18	38/F/ Eu	3	none	behavioral (withdrawn, irritable), sore throat	abdominal pain, lethargy, irritability, photophobia, drooling	NR	NR	NR	18	migraine, foot		increased sweating, dizziness on standing, heat intolerance	seborrheic dermatitis	parasomnia		sensory sensitivities (photophobia, phonophobia, sensory integration), left ptosis	autism	(+)		mild Ehlers-Danlos, hypermobility				18	POGZ (p.Cys652Arg);	POGZ (p.Cys652Arg); TRAP1 (p.Ile253Val) LP variant based on Lee et al. 2015	POLG (p.Gly268Ala)
19	21/M/Eu	18	lack of sleep, sinus infection, fasting, possibly stress	none	abdominal pain, headache, photophobia, phonophobia, infrequent dizziness, extreme muscle weakness (symmetrical)	1-2	72-96	4-10 emesis/hour	19	migraine/headaches	IBS, constipation, diarrhea, GERD	cold intolerance, palpitations	recurrent chronic sinusitis/allergic rhinitis, past West Nile Virus infection	insomnia, parasomnia	anxiety, depression	tinnitus, history of multiple concussions, tremulousness, hyperreflexia, pineal cyst, paresthesia	ADHD	(+)	interstitial cystitis, urinary frequency					19							tRNA-alanine [TA] (m.15904C>T) Heteroplasmic highly conserved VYX frequency 1.5%-check mitomap
20	12/M/Eu	3	heat, fasting, too much exercise/exertion, illness, rage episodes	none	photo/phonophobia, dizziness, clamminess, lethargy	2	2	severe headache; max emesis 3-4x in first hours	20	migraine, CPRS (neck, chest, abdomen, penis, arms, legs, hands, feet), abdomen	GERD, ulcers in colon, food protein-induced enterocolitis syndrome, dumping syndrome, diarrhea, bloating, pancreatitis	heat intolerance, unexplained fevers, dizziness	PANDAS	parasomnia	mood instability, anxiety	encephalitis, sensory sensitivity (phonophobia), abnormal movements, tics, episodes of blurred vision, tinnitus, puritis	ADHD	(+)	urinary frequency/hesitancy		short stature, Hashimoto	anemia		20				deletion on chromosome 14 that crosses IgG2		GRM1 (p.Gly884Leu)	COX2 (p.Ile30Val , m.7673A>G) homoplasmic variant that is rare (0.00000) and conserved
21	30/F/Eu	0	temperature (Too hot and too cold)	dizziness	lethargy, increased photophobia, phonophobia, headache, Severe leg pain, dizziness, muscle weakness, difficult walking due to weakness and poor balance	8-13	12	no abdominal pain or change in bowel habits	21	headaches, endometriosis	IBS, nausea, constipation	palpitations in past, heat/cold intolerance			anxiety	vertigo, photophobia, episodic ataxia, tinnitus		(+)	urinary hesitancy/frequency	hypermobility	hypothyroidism			21
22	16/F/Eu	6	Halloween, sleepover, over tired, car rides, menstruation	none	lethargy, pain, occassional muscle weakness	1	24-48	burning pain that radiates upwards from epigastrum to larynx	22	migraine/headaches, CPRS (ankle, frequent sore throat, joint pain in ankles/knees, whole body myalgia, frequent lymph nodes swelling)	nausea, GERD	dizziness on standing, toes purple and cold; two occasions with severe episodes, presyncope, partial syncope, severe bilateral weakness	frequent/chronic sinus infections		anxiety	photophobia, buzzing and distinct electrical shock-like sensation in ankles with radiation up legs, often triggered by walking, episodes of ataxia, muscle weakness		(+)				motion sensitivity		22				KIF1B (Val1600Met)
23	46/F/Eu	5	stress or lack of sleep	anxiety/racing/visual aura	lethargy, muscle weakness, dizziness	4	12	80% required emergency care/admission	23	back, bones, joints	nausea	autonomic over-responsitivity, palpitations		insomnia	anxiety	photophobia, muscle weakness	ADHD	(+)		hypermobility		scoliosis		23	CACNA1S (p.Val1253Ala)
24	18/M/As	14	none	occasional fatigue	lethargy, phonophobia and phonophobia, circles under eyes, pallor; some abdominal pain on occasion	5	24-96	severe	24	migraine, muscles, chest pain in bones	nausea, constipation	heat intolerance	low IgG, frequent viral-like upper respiratory tract infections		anxiety, depression		autism	(+)						24						GRIN2A (p.Thr141Met)
25	10/M/Eu	8	none	none	fatigue, diarrhea, sometimes cramps	1	1.5-2		25			cold intolerance	sinus infections, lingering colds, asthma	hypersomnia		hypotonia		(+)						25			CHAMP1 (Pro406Ser); SCN4A (p.Ser906Thr, c.2717G>C)					MT-TM (NT Change: 4464A>G) moderate conservation secondary structure. Rare
26	4/F/Eu,LA	2	none	smell	headache, will not eat, lethargy (very), occasionally fever to 100.5	1-2	0.5-4		26			history of random unexplained fevers up to 39 C				photophobia, dural fistula		(+)	daytime enuresis, dysuria	hypermobility		foul odor with carnitine, motion sickness		26			POGZ (p.Lys871Asn, c.2613G>T)	15q11.2 (520 kb deletion)
27	25/F/SA	22	menses	lethargy, difficult to communicate, photo/phonophobia, dizziness, sometimes headache	gagging, sweating, palpitations, anxiety	4	24-144	max emesis: > 10 emesis/hour; recovery is quick, at most one day	27	migraine/headaches	nausea	heat sensitivity, dizziness	pruritus, eczema	parasomnia	anxiety, depression			(+)						27	SCN9A (p.Ser802Gly), SCN10A (p.Val1697Ile)		CACNA1A (CAG 7/11); SCN9A (p.Ser802Gly)	KCNK18 (p.Tyr121fs , c.361dupT)		GRM1 (p.Ser940Thr)
28	4/M/EA	6 m/o	none	swallowing	stomach pain, refuses food, lethargy, fatigue, sleeps more	4	72-168	max emesis 4-5/hour	28		GERD		mild eczema, dermatographia			hypotonia						motion sickness		28			PDHA1 (p.Met320Leu, c.958A>C)
29	10/M/AA/La	5.5	stress	severe abdominal pain	lethargy, fatigue, abdominal pain	sporadic	24-144	pain is very severe and diffuse in the abdomen; max vomiting 5x/hour	29		constipation	heat intolerance		parasomnia	anxiety		dyslexia							29			SCN1A (p.Ile1437Val, p.Ile1452Val, p.Ile1465Val);
30	12/M/Eu (part finnish)	12	too much sugar, sun, heat, dehydration, lack of sleep, fasting, viral illness	sharp abdominal pain	severe abdominal pain, fatigue, weakness, ataxia (in worse attacks), lethargy, pallor	2-3	1-5	severe abdominal cramping	30	headaches					anxiety			(+)						30	CACNA1S (p.Ser516Leu)		CACNA1A (CAG 7/11)		GRM1 (p.Val929Ile)
31	17/F/Eu	16	none	none	headache, abdominal pain, dizziness, pallor, diarrhea, photo/phonophobia, fatigue/lethargy	4	72-120	admitted 3x for intraveous fluids	31	migraine/headaches, chest, shoulders, flank, mid-sternum, arthralgia/TMJ, chronic sore throat, hip	nausea, gastroparesis	heat intolerance		insomnia, sleep paralysis, hypersomnia	anxiety, depression	staring spells		(+)						31			CACNA1A (CAG 13/4)	ASMT (chrXp22.33p22.33x1 [1,529,000-1,644,000], 115-kb pseudo autosomal region deletion)
32	14/M/Eu,As	11	none, stress	none	exhaustion	8-13	168-240	sleeps a lot	32	trochanteric bursitis, migraine/headaches, abdominal migraine, heartburn, joint pain					anxiety, depression	muscle twitches/tremor, blinking tics								32			CACNA1S (p.Cys288Gly)
33	14/F/Eu	0	none	none	lethargy, exhaustion, hypoglycemic	NR	NR	about 6-7 episodes that required emergency care, then a few thereafter that were handled at home	33	migraine/headaches, leg cramps, abdomen	dysmotility/constipation	tachycardia, always feels hot, constant excessive sweating, dizziness on standing	anal itching	parasomnia	anxiety			(+)				vaginal malformation		33						GRM1 (p.Pro729Thr)	COX2 (p.Gln59Arg , m.7761A>G) rare, conserved
34	15/F/Eu	NR	none, sometimes high-gluten foods	none	cold sweats, shakiness, and brain fog	daily	1	becomes hypoglycemic when eats a lot of simple sugars	34	CPRS (head, face, hand, leg, foot) (headache)	IBS, pancreatic insufficiency, bowel incontinence	POTS		parasomnia, insomnia	anxiety	hemiparesis, tics, ataxia, absences, photophobia, past episodes of altered mental status		(+)	bladder incontinence		hair loss	general edema, bruises easily		34			OPRM1 (p.Cys192Phe, c.575G>T); RYR2 (p.Asn4736Asp, c.14206A>G)
35	27/M/Eu	16	none	none		52-78	lasts until he receives IVIG	vomiting only with meals	35		alternating constipation and diarrhea	excessive fight-or-flight response	CVID		anxiety, OCD	tics	autism		frequent urination					35			GFAP (p.Pro47Leu), RYR2 (p.Arg4573His, c.13718G>A)	TNFRS13B (p.Ala181Glu); NRXN1 (de novo)		GRIN2C (p.Arg516Cys)
36	41/M/Eu	34	alcohol, energy drinks, illness, exercise, stress, fasting	none	lethargy, epigastric burning, R-sided weakness (face to toes)/headache (occasional)	Multiple per year	Varies hours to a week	major episodes with emesis up to 20 times per day, lead to significant weight loss	36	migraine, low back, joints, upper abdominal/epigastric	IBS, constipation			insomnia	anxiety, depression, anhedonia		mild intellectual disability	(+)						36			MEFV (p.Pro369Ser)
37	23/M/Eu,La	9	holidays, too much food at one time, not sleeping, or viral illness	2-day severe pain spike	sweaty, pale, autonomic symptoms	1-2	96-120	emesis every 10 mins, never stops without going to emergency care	37	migraine, joints, abdomen, muscles	IBS, diarrhea, loose stools	dizziness on standing, always cold		parasomnia (restless leg)	anxiety	photophobia, periodic paralysis		(+)						37	KCNJ18 (p.Gln407*)	KCNJ18 (p.Gln407*)
38	19/F/Eu	17	hiking, air flights	loss of appetite	lethargy, stops BMs, abdominal pain, photophobia, withdraws, paresthesia, anxiety	13	168-240		38		soft stools				anxiety		autism							38			POLG (p.Arg42_Gln43insGln, c.125_126insGCA); POLG (p.Gly517Val)				MT-TR m.10410T>A rare variant in tRNA-Arg gene that adds a Watson-Crick bond in the ACC stem where humans generally lack this binding, yet almost all mammals (to platypus) have such binding.
39	19/M/Eu	15	staying up late, dehydration	seizure	abdominal pain, constipation, fatigue, lethargy	17	96-120	seizures with vomiting (but not all the time); aborted with ondansetron	39		gastroparesis (nausea)	POTS, heat intolerance			anxiety	epilepsy, encephalopathy	ADHD, learning disability	(+)	enuresis	hypermobility				39			TRAP1 (p.Asp685Asn, p.Arg469His)	CSNK2B (p.Arg47*) de novo (sz, NDD)			ND5 m.12706T>C clinvar LP, mitomap+
40	35/F/Eu	teen	stress	none		4	several hrs	prolonged, required emergency care	40	migraine/headaches, myalgia, abdomen	nausea, IBS, pancreatitis	arrhythmia, palpitations, episodes of near syncope, heat/cold sensitivity		insomnia, parasomnia (restless leg)	anxiety, depression	vertigo, tinnitus, some nystagmus, numbness in both thighs	autism, difficulty in thinking, concentration and memory	(+)			pre-diabetes			40				GLS2 (p.Arg149Gln , c.446G>A); GLS2 (p.Arg107Trp , c.319C>T)
41	27/F/Eu	15	anxiety, viral infection, lack of sleep	none	headache, abdominal pain, lethargy, weakness, ataxia, dizziness	4	24-48	vomiting in the first hours, max 20-25 in the worst hour	41	headaches, hand joints, frequent sore throat and tender lymph nodes outside of infections	gastroparesis (nausea), IBS, diarrhea, constipation	POTS, dizziness on standing, afib, occasional presyncope, heat/cold intolerance		parasomnia	anxiety, depression	frequent anesthesia and paresthesia in fingers and toes		(+)						41			PRRT2 (p.Pro216Leu, c.647C>T)	CTNNA3 (chr10q21.3q21.3x1 [66,195,323-66,324,900], 130kb)			(tRNA threonine gene [TT]) m.15907A>G loss of Watson-Crick binding in the D-stem
42	15/F/Eu	1	anxiety	none	lethargy, anxiety, weakness, paresthesia, paralysis, photophobia, phonophobia, pallow, dark circles under eyes	varies on trigger	3-6, many are 24	usually requries for emergency care, rescue meds, and intravenous fluid	42	migraine/headaches				parasomnia	anxiety									42			PRRT2 (p.Pro216Leu, c.647C>T)					ND1 (p.Thr87Pro , m.3565A>C) extremely rare (not seen before), highly conserved, and predicted to be likely deleterious by SIFT and PolyPhen2.
43	13/M/Eu	NR	none	none		4	24	some require emergency care	43	headaches, abdomen, leg/ankle pain	GI dysmotility with SIBO, constipation	heat/cold intolerance, high resting heart rate			anxiety	brain fog, stroke-like episode	autism	(+)				edema		43			CACNA1A (p.Arg2298Pro , c.6893G>C); CACNA1S (p.Ser1857Asn , c.5570G>A); PNKD (p.Glu307Lys , c.919G>A); RYR1 (p.Cys3304Ser , c.9910T>A)			GLRA1 (p.Val67Gly); GRIN2C (p.Leu65Phe); GRIN2D (p.Gly1227Trp)
44	26/M/Eu	NR	defecation, food (meat, soy, dairy), anxiety	none	abdominal pain, anxiety, fatigue, and photophobia, hysterical anxiety, epigastric pain	4	72-96	requires emergency care; abdominal pain 10/10 in severity	44	migraine/headaches, joints, muscles in back, tender lymph nodes, epigastric	occasional constipation			parasomnia (restless leg), insomnia	anxiety			(+)						44	RYR2 (p.Glu4431Lys)0.0%KG moderate conservation-VUS clinvar
45	24/F/AA	NR	menses	none	lethargy, left-sided abdominal/flank pain, headaches, photophobia, phonophobia, increased headache with head movement	4	48-144	emergency care once to twice a year	45	migraine/headaches	IBS, diarrhea, gastroparesis (nausea)			parasomnia	anxiety			(+)						45			SCN4A (p.Arg1408Cys, c.4222G>A) 0.05% conservation uscs very high to lamprey
46	19/F/Eu	0	none	none	dizziness	1	1-2		46	migraine/headaches, CPRS, hip, lower back, knees, wrists, hands, abdomen	constipation, pancreatitis, GI dysmotility	heat and cold intolerance, feeling hot when it is cold, and vice-versa	pruritis	parasomnia (restless leg)		photophobia, intermittent ataxia, history of left hemiparesis		(+)						46	CACNA1A (p.Arg2135His, c.6404C>T) 0% conserved (Legacy patient, not hg38)
47	7/F/Eu, AS	0	heat, overexercise, viral infections, vaccinations, fasting	none	abdominal pain, edema, hives, lethary, HA, dizziness, vertigo, blurred vison, ataxia, muscle weakness, leg pain, paresthesia, loss of vision, photo/phonophobia, more fatigue and pain, constipation	4	96-120	severe, requires emergency care for intravenous fluids	47	migraine/headaches, legs, abdomen, joints	eosinophilic colitis	heat intolerance, hyperhidrosis	MCAS, asthma, utricaria		anxiety	epilepsy, occasional tinnitus		(+)	urinary hesitancy and frequency		ketotic hypoglycemia	failure-to-thrive, carnitine deficiency, Munchausen-by-proxy allegations		47	SCN10A (p.Arg14Leu) (2.32 cons, 0.002ExAC) very little info on this gene					GLRA1 (p.Gly378Ser); GRIA4(p.Gly793Cys)
48	10/F/Eu	6	none	none	headache, abdominal pain, lethargy, photo/phonophobia	7	5	severe abdominal pain, vomiting (max every 5-10 min x2 hours)	48			autonomic over-responsitivity		parasomnia	anxiety	abnormal movements (not specified)	ADHD, learning disability, disarticulation	(+)						48	MEFV (p.Ile591Thr)		GFAP (p.Asp157Asn)
49	23/F/La	22	anxiety, stress, motion sickness	none	abdominal pain, fatigue, lethargy, dizziness, diaphragmatic pain	4	120-144	severe pain, required emergency care	49	lower back	constipation			insomnia	anxiety, depression, anorexia nervosa	tinnitus	ADHD					cystic fibrosis		49	TRPA1 (p.Ala138Ser , c.412G>T)		SCN4A (p.Lys477Arg , c.1430A>G)	CFTR (Phe508del)
50	20/F/Eu	16	menses, going to bed after midnight	different thinking	fatigue, loose stools, phonophobia, tachycardia	4	24-120	vomiting (max: 5x, often QOD with vomiting)	50			tachycardia		parasomnia	anxiety, depression	epilepsy, tinnitus			frequent urination					50			CACNA1A (p.Tyr2228Asn), SCN4A (p.Thr323Met), SCN11A (p.Gly1736Val)			GLRA1 (p.Gly370Ser)
51	12/M/Eu, EA	6	lack of sleep, infections, abrupt changes in routine, vacations, constipation, post-endoscopy	none	lethargy, photo/phonophobia, refuses to talk, pallor, constipation, dizziness	17	72-120	requires emergency care	51	back, leg	IBS, constipation							(+)						51			RYR1 (p.Glu3684del , c.11048_11050delAGG); TRAP1 (p.Tyr444Asn, c.1330T>A)			GABBR1 (p.Phe645Leu)		MT-TG (m.10003T>C): A rare (one in 5K people) variant in the mtDNA transfer-RNA glycine gene. This variant is the distal nucleotide of the t-stem, which is generally non-Watson-Crick (T-G), but with the variant in Lucas is Watson-Crick (C-G), increasing the double-stranded stem from 3 to 4 nucleotide pairs. Per Mamit (http://mamit-trna.u-strasbg.fr/tables.asp?aminoacid=27), 125/136 (92%) mammalia…
52	16/M/Eu	2	holidays, anxiety, physial exhaustion, viral illness	hot, abdominal pain, quiet, tired	severe abdominal pain, lethargy, pallor, dark circles under eyes, tachycardia	varies on trigger	120	vomiting is continuous, abdominal pain is severe; usually requires emergency care	52						anxiety	hyperekplexia	learning disability							52	TRPA1 (p.Met214Thr, c.641T>C)		CACNA1A (p.Ala454Thr, c.1360G>A); CACNA1A (CAG 7/7); POLG (p.Gly517Val); SCN4A (p.Ser906Thr, c.2717G>C)
53	20/F/Eu	15	alcohol, viral infection	none	lethargy, diarrhea, photophobia	varies on trigger	72	vomiting (every 15 minutes, with bile), no pain	53		gastroparesis (nausea)	dizziness when standing up quickly	frequent idiopathic hives	insomnia, parasomnia (sleep paralysis)	anxiety			(+)						53	RYR2 (p.Gly2094Ser)	MEFV (p.Ala744Ser)	OPRM1 (p.Ser147Cys)				MT-ATP6 (p.Ile138Thr , m.8939T>C) mitotaster and pp2 deleterious, sift benign. very rare, highly conserved
54	26/F/Eu	9	stress, food poisoning, activity	none	CVS has evolved into severe migraine headaches. confusion, disorientation, nausea, dizziness, photo/phonophobia	7-8	nr	may require emergency care	54	migraine/headaches, back/neck, joints and muscle	nausea, constipation, diarrhea, IBS	syncope upon standing, occasional palpiations, lightheadedness, hyperemesis gravidum			anxiety			(+)						54		RYR2 (p.Tyr3459*)	PRRT2 (p.Pro216Leu, c.647C>T)
55	6/M/Eu	6 m/o	none	headache and dizziness, tired, upset easily	photo and phonophobia, significant ataxia	12	48	emesis 30-45, max 20 emesis/hour	55		diarrhea			parasomnia		sensory aversions, hypotonia	learning disability, speech articulation disorder					congenital malformations (ear prominence, advanced bone age, horeshoe kidney; history of sagittal craniosynostosis and adenomyomatosis)		55			CACNA1A (CAG 7/11)
56	42/F/Eu	1	events, positive and negative	none	photo/phonophobia, extreme lethargy, weakness (whole body), drooling, thirst, headache	9-12	36		56	headache, chondromalacia	constipation	some dizziness on standing			anxiety	encephalopathy, hypotonia in early life	intellectual disability	(+)						56	PPM1D (p.Tyr401fs, c.1200delC)	PPM1D (p.Tyr401fs, c.1200delC)	RYR1 (p.Glu1880Lys , c.5638G>A)	MEF2D c.529C>T, p.Arg177Trp (de novo)-transcription factor affects dendritic spine density in a rat model
57	6/F/Eu	6 m/o	none	none	abdominal pain, diarrhea, fatigue, lethargy, phonophobia; sometimes headache	26	96-144		57	migraine/headaches, joints, shoulders, knees, neck; wears orthotics	IBS, early satiety, bloating	tachycardia a few times, heat intolerance	MCAS, eczema	insomnia		sensory sensitivities (phonophobia, sensory integration)		(+)	urinary frequency, nocturnal enuresis	Ehlers-Danlos syndrome				57						GRM1 (p.Val929Ile)
58	26/F/Eu, La	19	stress/anxiety, menses, over-exercise, lack of sleep, illness, likely fasting.	none	extreme epigastric stabbing burning pain, lethargy, fatigue, photophobia, phonophobia, dizziness, headaches (occasional)	2-4	1-2	start with a lot of vomiting (>4/hr at peak), then progress to lethargy	58	migraine/headaches, crps (pelvis, joints, bones), fibromyalgia, abdomen, frequent sore throat and tender lymph nodes when not ill	gastroparesis, IBS, constipation, GERD, nausea	dizziness, heat/cold intolerance	asthma	parasomnia (restless leg)	anxiety, depression	photophobia, some tinnitus in past		(+)	uterine bleeding			bone fractures		58			POLG (p.Gly517Val); SCN2A (p.Thr674Ala, p.Ile403Thr)			GABRB2 (p.Ser412Asn); GABRB3 (p.Pro11Ser)
59	16/M/Eu	0	none, viral-like illness	none		13-26	NR	severe emesis requiring intravenous fluids and ondansetron	59	migraine/headaches	constipation	autonomic over-responsitivity	CVID		anxiety, impulsiveness, irritability and anger	multiple episodes of progressive encephalopathy, epilepsy, involuntary movements (tics)	ADHD, autism, executive function deficit, dyspraxia	(+)			type 1 diabetes mellitus	short stature		59			RYR2 (p.Ser1400Gly)
60	18/M/Eu	NR	NR	none		NR	6	NR	60	headaches, knee, feet				insomnia	OCD	epilepsy, abnormal movements (tics), episodes of anesthesia in legs, arms, hands; tingling episodes (paresthesia), hearing loss	autism	(+)			post-prandial hypoglycemia	motion sickness		60	TRAP1 (p.Arg128His , c.383G>A) allelic freq is 0.3%	TNFRSF1A (p.Arg121Gln , c.362G>A)
61	14/F/Eu	13	not sleeping, stress	euphoria	pain (abdominal average 8/10, head 7-8/10, limbs 8/10), spotty vision (increased), photophobia, phonophobia, dizziness, constipation, numbness (arms, legs, mouth), fatigue, lethargy, weakness, ataxia, limbs “are hard to move”, “heavy”.	4	192-264	nausea 8/10 in severity, pain 8/10 in severity, limbs "heavy and hard to move"	61	migraine/headaches, some abdominal pain, numbness in limbs		heat intolerance, toes, fingertips, and nose are always cold, frequent dizziness on standing, occasional presyncope	frequent itching on legs, asthma		anxiety, irritable, mood changes, low frustration tolerance, explosive anger, shyness	encephalopathy, ataxia, tinnitus, frequent tinnitus in both ears	learning disability, ADD, dyslexia, dysgraphia, processing delay	(+)	interstitial cystitis					61	SCN4A (His599Arg, c.1796A>G)
62	16/M/Eu	13	none	none	fatigue, diarrhea	1	5-8	mild	62		IBS in past	orthostatic signs and symptoms, syncope twice	seasonal asthma				ADHD			hypermobility				62
63	16/M/Eu	NR	none	none	lethargy, dizziness. presence of ketones is in the blood and urine, and free carnitine deficiency	12	72		63	hammertoes, wears orthotics	IBS, diarrhea, eosinophilic esophagitis, constipation			severe obstructive sleep apnea	anxiety, aggressive behavior	tremor, CMT neuropathy, strabismus, periodic paralysis	intellectual disability	(+)	frequent urination					63	SCN4A (p.Ser906Thr, c.2717G>C)
64	13/M/SA	7	change in diet, fasting	none	lethargy, and some abdominal pain	4	72-144	max 20 emesis/hr.	64	headache, CPRS, leg, abdomen, frequent sore throat	nausea, constipation		frequent viral-like illnesses, frequent itching	parasomnia				(+)	urinary frequency/urgency			high cholesterol		64	SCN10A (p.Ala123Val) 3.65 cons 0.08ExAC					GRIN2C (p.Val490Ile, p.Gly143Ser)
65	11/F/Eu	3	exertion, physical or mental (main), viral illness, fasting, sleep deprivation, cooling off after shower, swimming	bilateral eye pain	eye pain, lethargy, dizziness on standing	1-2	12		65	abdomen	diarrhea with high fat or sugar intake		frequent viral-like illnesses, frequent itching		anxiety			(+)						65	MEFV (p.Ile591Thr)
66	20/F/As	17	usually none, sometimes high stress (finals/midterms usually provoke episode, including an early episode); forgot nortriptyline for a few days.	none	lethargy, dizziness, weakness (whole body), burning in throat, panic attacks, chest pain	2	72-192	3-8 emesis/day	66	migraine/headaches with chest pain	IBS, diarrhea, constipation, SIBO, GERD, nausea, bloating		history of frequent illnesses		anxiety, depression	encephalopathy, tinnitus		(+)						66			MEFV (p.Pro369Ser, p.Arg408Gln)
67	30/F/Eu, As	22	stress	uncomfortable satiety	frontal acute headache, lethargy, pallor, dizziness, pre- and frank syncope a few times	varies on trigger	24-96	maximum emesis/hour >>10, cannot count	67	CPRS, neck pain after motor vehicle accident, occasional preexisting lower back pain	gastroparesis, nausea			insomnia	depression	seizure attributed in increase in bupropion	learning disability, ADHD	(+)						67			CACNA1A (CAG 7/13);
68	21/F/Eu,EA	6	intense exercise, allergic reaction, diet high in K and thiamine	visual aura with a clear area of lack of vision OU	dizziness, lethargy, headache, photophobia, phonophobia, fatigue, episodes of ptosis (bilateral) and muscle weakness, worsened myalgia	17-26	1-4	hard to move, worsened myalgia, even without exercise	68	migraine/headaches, myalgia	early satiety		autoinflammatory syndrome, allergic rhinitis, conjunctivitis, MCAS, dermatographia, cold urticaria, celiac disease	insomnia		periodic paralysis, neuropathic pain, intermittent ptosis and lethargy, muscle weakness		(+)				leg length discrepancy		68	SCN4A (p.Ala488Thr), CLCN1 (p.Thr736Ile)	TNFRSF1A (p.Arg121Gln, c.362G>A)
69	26/F/AA	NR	BM, fasting	none	lethargy, hypersensitivity to scents, pain	2	48-144	number of emesis varies from episode to episode; goes to hospital if episode does not abort after a day	69		nausea, constipation	syncope		insomnia	anxiety, depression	seizures						frequent nosebleeds		69			CACNA1S (p.Tyr299His, p.Ala814Thr); TNFRSF1A (p.Pro75Leu)			GLRA1 (p.Pro394Leu)
70	18/F/Eu, La	15	none, illness	none	headache, increased fatigue	4	96-144	require emergency care or admission	70	migraine/headaches, myalgia, random sharp stabbing pains in upper body: arms, hands, back, upper chest, frequent paresthesia, and anesthesia in the extremities, frequent sore throats, leg pain, joint pains	nausea, gastroparesis, IBS, diarrhea, constipation, bloating	palpitations with shortness of breath, dizziness, POTS-like signs and symptoms, heat intolerance, fingers and toes often turn blue, appears at random	frequent viral-like illness, frequent itching, asthma	insomnia	anxiety, depression	tremors on occasion in arms and legs, few seconds			urinary retention/urgency, frequent menses					70			RYR1 (p.Met2008Thr , c.6023T>C); CACNA1A (p.Gln2321_Gln2329del , c.6961_6987delCAGCAGCAGCAGCAGCAGCAGCAGCAG) (4)
71	7/M/Eu, As	3	virus, lack of sleep	none	abdominal pain, exhausted, lethargy, falls asleep, pallor, headache	8-12	4-6	7-8/10 in severity abdominal pain; maximum 4 emesis/hour	71															71						GRM1 (p.Pro1069Leu)
72	15/M/AS	15	none	none		4-8	72-144	requires emergency care	72	headaches, CPRS (back, shoulder)	constipation	syncope, tachycardia, heat intolerance			anxiety	vertigo, chronic progressive external ophthalmoplegia, conversion disorder, one episode of paralysis of legs for both legs, ptosis (worse when tired), some high frequency hearing loss bilaterally	autism	(+)						72	CACNA1S (p.Thr1335Ser, c.4003T>A)						7.7 kb heteroplasmic deletion from m.6468-14148. Haplogroup T2f
73	25/M/Eu	NR	none	none	ketosis, ataxia, lethargy, headache, URQ abdominal pain, brain fog, muscle weakness (R>L, often one arm or one leg), muscle twitches (mostly in legs, sometimes arms), muscle pain	8	24-48	severe	73	hemiplegic migraine, migraine/headaches, CPRS, abdomen, extremity pain	nausea			insomnia	depression	ataxia, vertigo, paresthesia, muscle weakness		(+)						73			OPRM1 (p.Cys192Phe, c.575G>T); SCN4A (p.Ser906Thr, c.2717G>C)			GRIN2B (p.Arg1016Lys)	mtDNA deletion m.492-14240 (46%)
74	19/F/Eu	17	none	none	severe dizziness, paresthesia, anesthesia, nausea, palpitations, tinnitus, muscle weakness, and pallor, sometimes vertigo	daily	1	severe dizziness	74	vestibular migraines, headaches	eosinophilic esophagitis, IBS, diarrhea, constipation, gastroparesis, nausea, GERD	POTS, episodes of dizziness with symmetrical muscle weakness, heat/cold intolerance	CVID, frequent itching, IgG deficiency	insomnia, parasomnia	depression	hypotonia, frequent paresthesia hands and feet, periodic paralysis, and numbness	developmental delays	(+)		Ehlers-Danlos syndrome- type III				74			CACNA1A (p.Arg2294Pro, c.6881G>C); CACNA1A (p.Arg2298Pro, c.6893G>C)				MT-CYB (15740C>T)-94% heteroplasmy
75	23/M/Eu	20	stress	none	lethargy	2	72	peak vomiting every 10-15 minutes; severe enough to drop out of college one semester	75	back	ulcerative colitis			insomnia		near-constant tinnitus following ear infection, mild high-frequency hearing loss, constant phonophobia								75		POLG (p.Lys460_Leu463del)	RYR2 (p.Ser2829Gly)	PMP22 del chr17p12p12x1(14,186,500-15,584,000)-CMT		GRIN2D (p.Thr397Met)
76	22/M/Eu, SA	18	returning to school, lack of sleep, stress, illness (sinus infection), flu vaccination, over-exercise	constipation up to a week before. Increased saliva, sweating, feeling hot and cold	abdominal pain, headache, photo-/phono-phobia, irritable, lethargic, fatigue, constipation, bloating, muscle stiffness, palpitations, myalgia, lightheadedness, feeling that cannot move, fever (to 101)	varies on trigger	2-48	emesis 40/48 hours of episode; max emesis: 20x/hour	76		GERD	excessive sweating	frequent sinusitis, and Strep pharyngitis, exercise-induced asthma	insomnia	anxiety, depression	tics								76	SCN4A (His599Arg, c.1796A>G)		CACNA1A (p.Arg68Gln, c.203G>A); CACNA1A (CAG 7/13); CACNA1S (p.Arg1658His, c.4973G>A); GFAP (p.Pro47Leu, c.140C>T); RYR1 (p.Tyr3173His, c.951T>C); TRAP1 (p.Ser477_Gly478insAla , c.1430_1432dupCCG)			GRIN2C (p.Val490Ile)
77	5/M/SA	3 m/o	stress and viral infections	none	refuses to eat, reacts as in pain episodically “cramps”, lethargy, fatigue	4-6	96-120	max emesis: multiple retching, usually one productive emesis in an hour	77							encephalopathy, microcephaly, hypotonia, visual immaturity, abnormal auditory brainstem responses	autism, intellectual disability				central hypothyroidism			77	POGZ (p.Phe806Leu , c.2418T>A), POGZ (p.Phe806Leu , c.2418T>A)-both de novo	POGZ (p.Phe806Leu , c.2418T>A), POGZ (p.Phe806Leu , c.2418T>A)-both de novo	SLC1A3 (p.Arg47Gln)			GABRA5 (p.Glu107Lys)
78	4/M/EA	1	none	none	lethargy, migraine	10	14		78			heat intolerance		insomnia			ADHD, dyspraxia				hypothyroidism	thalassemia minor		78			SCN4A (p.Ser906Thr, c.2717G>C)
79	10/M/Eu	2	social excitement, physical fatigue, lack of sleep; more episodes with hot weather.	pallor, lethargy and abdominal pain	deep sleep, abdominal pain	17-26	5	vomiting for 30-60 minutes, 3-10 emesis, then deep sleep for 5 hours, or the next morning if occurred at end of day	79		IBS, diarrhea, constipation						poor attention	(+)						79
80	26/F/Eu	0	viral illnesses, psychological stress, physical over-exertion, lack of sleep, fasting, menses; previously: very loud sounds, turtle necks.	none	lethargy, fells overheated, symmetrical muscle weakness, shaky, diarrhea, phonophobia, headache, ataxia	4	4-12		80	headaches/migraines, severe random pains everywhere (chest, arm, leg, neck, head)	nausea	heat intolerance, dizziness on standing, frequent presyncope	asthma, frequent viral-like illness, occasional pruritis	parasomnia	anxiety, depression	episodic tightness of muscles, hand shaking, dry eyes, tinnitus		(+)						80	SCN1A (p.Arg1928Gly, c.5782C>G)		CACNA1A (CAG 7/7)
